# Supplementary material for: Optic neuropathy as a presenting feature of vitamin B-12 deficiency: A systematic review of literature and a case report
Source: Ann Med Surg (Lond). 2020 Nov 5;60:316–22. doi: 10.1016/j.amsu.2020.11.010 (PMC7653199; doi:10.1016/j.amsu.2020.11.010)
Supplement: Application [file mmc1.pdf]

## SCARE 2018 Checklist

| Topic                      | Item      | Checklist item description                                                                                                                                                                                               | Page Number |
|----------------------------|-----------|--------------------------------------------------------------------------------------------------------------------------------------------------------------------------------------------------------------------------|-------------|
| <b>Title</b>               | <b>1</b>  | The words “case report” should appear in the title. The title should also describe the area of focus (e.g. presentation,                                                                                                 | 1           |
| <b>Key Words</b>           | <b>2</b>  | 3 to 6 key words that identify areas covered in this case report (include "case report" as one of the keywords)                                                                                                          | 1           |
| <b>Abstract</b>            | <b>3a</b> | Introduction — Describe what is unique or educational about the case (i.e. what does this work add to the surgical literature, and why is this important?).                                                              | 1           |
|                            | <b>3b</b> | Presenting complaint and investigations – describe the patient's main concerns and important clinical findings.                                                                                                          |             |
|                            | <b>3c</b> | The main diagnoses, therapeutics interventions, and outcomes.                                                                                                                                                            |             |
|                            | <b>3d</b> | Conclusion — Describe the main lessons to “take-away” from this case study                                                                                                                                               |             |
| <b>Introduction</b>        | <b>4</b>  | Background – summarise what is unique or educational about the case. Give reference to the relevant surgical literature and current standard of care. The background should be referenced, and 1-2 paragraphs in length. | 2           |
| <b>Patient Information</b> | <b>5a</b> | Demographic details – include de-identified demographic details on patient age, sex, ethnicity, occupation. Where possible, include other useful pertinent information e.g. body mass index and hand dominance.          | 5           |
|                            | <b>5b</b> | Presentation - describe the patient's presenting complaint (symptoms). Describe the patient's mode of presentation (brought in by ambulance or walked into Emergency room or referred by family physician).              |             |
|                            | <b>5c</b> | Past medical and surgical history, and relevant outcomes from interventions                                                                                                                                              |             |

|                                 |           |                                                                                                                                                                                                                                                                                                                                    |                                   |
|---------------------------------|-----------|------------------------------------------------------------------------------------------------------------------------------------------------------------------------------------------------------------------------------------------------------------------------------------------------------------------------------------|-----------------------------------|
|                                 | <b>5d</b> | Other histories – Describe the patient's pharmacological history including allergies, psychosocial history (Drug, smoking, and if relevant, accommodation, walking aids), family history including relevant genetic information.                                                                                                   |                                   |
| <b>Clinical Findings</b>        | <b>6</b>  | Describe the relevant physical examination and other significant clinical findings. Include clinical photographs where relevant and where consent has been given.                                                                                                                                                                  | 5                                 |
| <b>Timeline</b>                 | <b>7</b>  | Inclusion of data which allows readers to establish the sequence and order of events in the patient's history and presentation (using a table or figure if this helps). Delay from presentation to intervention should be reported.                                                                                                | 5-6                               |
| <b>Diagnostic Assessment</b>    | <b>8a</b> | Diagnostic methods – describe all investigations taken to arrive at methods: physical exam, laboratory testing, radiological imaging, histopathology.                                                                                                                                                                              | 5-6                               |
|                                 | <b>8b</b> | Diagnostic challenges – describe what was challenging about the diagnoses, where applicable, for example access, financial, cultural.                                                                                                                                                                                              |                                   |
|                                 | <b>8c</b> | Diagnostic reasoning – Describe the differential diagnoses and why they were considered.                                                                                                                                                                                                                                           |                                   |
|                                 | <b>8d</b> | Prognostic characteristics when applicable (e.g. tumour staging or for certain genetic conditions). Include relevant radiological or histopathological images in this section.                                                                                                                                                     |                                   |
| <b>Therapeutic Intervention</b> | <b>9a</b> | Pre-intervention considerations – if there were patient-specific optimisation measures taken prior to surgery or other intervention these should be included e.g. treating hypothermia/hypovolaemia/hypotension in a burns patient, Intensive care unit treatment for sepsis, dealing with anticoagulation/other medications, etc. | 5-6<br>(no surgical intervention) |
|                                 | <b>9b</b> | Interventions – describe the type(s) of intervention(s) deployed (pharmacologic, surgical, physiotherapy, psychological, preventive). Describe the reasoning behind this treatment                                                                                                                                                 |                                   |

|                               |            |                                                                                                                                                                                                                                                                                                                                                                                                                                                                                                                                                       |   |
|-------------------------------|------------|-------------------------------------------------------------------------------------------------------------------------------------------------------------------------------------------------------------------------------------------------------------------------------------------------------------------------------------------------------------------------------------------------------------------------------------------------------------------------------------------------------------------------------------------------------|---|
|                               |            | <p>offered. Describe any concurrent treatments (antibiotics, analgesia, anti-emetics, nil by mouth, Venous thrombo-embolism prophylaxis, etc). Medical devices should have manufacturer and model specifically mentioned.</p>                                                                                                                                                                                                                                                                                                                         |   |
|                               | <b>9c</b>  | <p>Intervention details – describe what was done and how. For surgery include details on; anaesthesia, patient position, use of tourniquet and other relevant equipment, prep used, sutures, devices, surgical stage (1 or 2 stage, etc). For pharmacological therapies include information on the formulation, dosage, strength, route, duration, etc. Include intra-operative photographs and/or video or relevant histopathology in this section. Degree of novelty for a surgical technique/device should be mentioned e.g. "first in human".</p> |   |
|                               | <b>9d</b>  | <p>Who performed the procedure - operator experience (position on the learning curve for the technique if established, specialisation and prior relevant training). For example, "junior resident with 3 years of specialised training"</p>                                                                                                                                                                                                                                                                                                           |   |
|                               | <b>9e</b>  | <p>Changes – if there were any changes in the interventions, describe these details with the rationale.</p>                                                                                                                                                                                                                                                                                                                                                                                                                                           |   |
| <b>Follow-up and Outcomes</b> | <b>10a</b> | <p>Follow-up – describe 1) When the patients was followed up. 2) Where. 3) How (imaging, tests, scans, clinical examination, phone call), and 4) whether there were any specific post-operative instructions. Future surveillance requirements - e.g. imaging surveillance of endovascular aneurysm repair or clinical exam/ultrasound of regional lymph nodes for skin cancer.</p>                                                                                                                                                                   | 6 |
|                               | <b>10b</b> | <p>Outcomes - Clinician assessed and (when appropriate) patient-reported outcomes (e.g. questionnaire details). Relevant photographs/radiological images should be provided e.g. 12 month follow-up.</p>                                                                                                                                                                                                                                                                                                                                              |   |
|                               | <b>10c</b> | <p>Intervention adherence/compliance - where relevant how well patient adhered to and tolerated their treatment. For example,</p>                                                                                                                                                                                                                                                                                                                                                                                                                     |   |

|                            |            |                                                                                                                                                                                                                                                                                                                                                                                                                                                                                                   |      |
|----------------------------|------------|---------------------------------------------------------------------------------------------------------------------------------------------------------------------------------------------------------------------------------------------------------------------------------------------------------------------------------------------------------------------------------------------------------------------------------------------------------------------------------------------------|------|
|                            |            | post-operative advice (heavy lifting for abdominal surgery) or tolerance of chemotherapy and pharmacological agents                                                                                                                                                                                                                                                                                                                                                                               |      |
|                            | <b>10d</b> | Complications and adverse events – all complications and adverse or unanticipated events should be described in detail and ideally categorised in accordance with the Clavien-Dindo Classification. How they were prevented, diagnosed and managed. Blood loss, operative time, wound complications, re-exploration/revision surgery, 30-day post-op and long-term morbidity/mortality may need to be specified. If there were no complications or adverse outcomes this should also be included. |      |
| <b>Discussion</b>          | <b>11a</b> | Strengths – describes the strengths of this case                                                                                                                                                                                                                                                                                                                                                                                                                                                  | 7-12 |
|                            | <b>11b</b> | Weaknesses and limitations in your approach to this case. For new techniques or implants - contraindications and alternatives, potential risks and possible complications if applied to a larger population. If relevant, has the case been reported to the relevant national agency or pharmaceutical company (e.g. an adverse reaction to a device)                                                                                                                                             |      |
|                            | <b>11c</b> | Discussion of the relevant literature, implications for clinical practice guidelines and any relevant hypothesis generation.                                                                                                                                                                                                                                                                                                                                                                      |      |
|                            | <b>11d</b> | The rationale for your conclusions.                                                                                                                                                                                                                                                                                                                                                                                                                                                               |      |
|                            | <b>11e</b> | The primary “take-away” lessons from this case report.                                                                                                                                                                                                                                                                                                                                                                                                                                            |      |
| <b>Patient Perspective</b> | <b>12</b>  | When appropriate the patient should share their perspective on the treatments they received.                                                                                                                                                                                                                                                                                                                                                                                                      | 6    |
| <b>Informed Consent</b>    | <b>13</b>  | Did the patient give informed consent for publication? Please provide if requested by the journal/editor. If not given by the patient, explain why e.g. death of patient and consent provided by next of kin or if patient/family untraceable then document efforts to trace them and who within the hospital is acting as a guarantor of the case report.                                                                                                                                        | Yes  |

|                                   |           |                                                                                                                     |                         |
|-----------------------------------|-----------|---------------------------------------------------------------------------------------------------------------------|-------------------------|
| <b>Additional<br/>Information</b> | <b>14</b> | Conflicts of Interest, sources of funding, institutional review board or ethical committee approval where required. | Title page<br>and pg 19 |
|-----------------------------------|-----------|---------------------------------------------------------------------------------------------------------------------|-------------------------|
